# Supplementary material
Source: Elsevier journal article supplement (https://www.sciencedirect.com/science/article/pii/S2530053921000432)
Supplement: mmc1 [file S2530053921000432:mmc1.doc]

BJORL-D-19-00274 – Material Suplementar

| **Classificação** | **Grupo sem fissura - Normal a muito leve** | | | | | | | | | |
| --- | --- | --- | --- | --- | --- | --- | --- | --- | --- | --- |
| **Frequência (Hz)** | **250** | | **500** | | **1000** | | **2000** | |  |  |
|  | **OD** | **OE** | **OD** | **OE** | **OD** | **OE** | **OD** | **OE** | **Média da OD** | **Média da OE** |
| **T0** | 22,23+  3,2 | 22+  2,9 | 17,1+  2,3 | 16,9+  3,1 | 14+  2,9 | 13,33+  1,5 | 11,12+  1,8 | 10,89+  2,2 | 16,1325  +  2,55 | 15,78 +  2,425 |
| **T1** | 18+  4,2 | 19+  3,5 | 13,13+  1,9 | 12,85+  2,7 | 11,15+  2,1 | 10,16+  2,1 | 9,12 +  3 | 8,13+  1,8 | 12,85 +  2,8 | 12,53+  2,52 |
| **T2** | 17,98+  1,2 | 20+  1,2 | 12,9+  1,2 | 12,76+  2,2 | 12,08+  1,9 | 10,04+  3,1 | 8,7+  1,8 | 8,05+  1,9 | 12,91+  1,52 | 12,71 +2,1 |
| **T3** | 17,74+  0,5 | 20+  0,5 | 12,78+  2,1 | 12,96+  3,2 | 12,06+  2,5 | 11,11+  2,8 | 8,81+  2,8 | 8,43+  2,1 | 12,84+  1,97 | 13,12+  2,15 |
| ***P* valor** | | | | | | | | | **0,0024*** | **0,0062*** |
| ***F* valor** | | | | | | | | | 5,7157 | 4,7668 |

**Tabela S1**. Médias e desvio padrão das medidas dos audiogramas em diferentes frequências de fala e intervalos de tempo em decibéis no grupo Ia (teste ANOVA).

T0 - antes da ERM; T1 - ao final da ERM; T2 - 3 meses após ERM; e T3 - ao final de 6 meses; OD, orelha direita; OE, orelha esquerda; * *p* < 0,05 (significante)

**Tabela S2.** Resultados do teste *post-hoc* de Tukey HSD explicando as significâncias nas análises de variância para o grupo Ia

| **Comparação Intragrupo** | **Diferença Média** | | | **IC95%** | | ***P* valor** | |
| --- | --- | --- | --- | --- | --- | --- | --- |
| **OD** | | **OE** | **OD** | **OE** | **OD** | **OE** |
| **T0 vs. T1** | -3,2825 | -3,2500 | | -5,8721 a -0,6929 | -5,8837 a -0,6163 | **0,0081*** | **0,0103*** |
| **T0 vs. T2** | -3,2225 | -3,0700 | | -5,8121 a -0,6329 | -5,7037 a -0,4363 | **,0096*** | **0,0168*** |
| **T0 vs. T3** | -3,2925 | -2,6600 | | -5,8821 a -0,7029 | -5,2937 a -0,0263 | **0,0079*** | **0,0470*** |
| **T1 vs. T2** | 0,0600 | 0,1800 | | -2,5296 a 2,6496 | -2,4537 a 2,8137 | **0,001*** | **0,0470*** |
| **T1 vs. T3** | 0,0100 | 0,5900 | | -2,5996 a 2,5796 | -2,0437 a 3,2237 | 1,4295 | 0,9313 |
| **T2 vs. T3** | 0,0700 | 0,4100 | | -2,6596 a 2,5196 | -2,2237 a 3,0437 | 0,9998 | 0,9752 |

OD, orelha direita; OE, orelha esquerda; IC, intervalo de confiança da diferença

| **Classificação** | **Grupo Sem fissura -Leve** | | | | | | | | | |
| --- | --- | --- | --- | --- | --- | --- | --- | --- | --- | --- |
| **Frequência (Hz)** | **250** | | **500** | | **1000** | | **2000** | |  |  |
|  | **OD** | **OE** | **OD** | **OE** | **OD** | **OE** | **OD** | **OE** | **Média da OD** | **Média da OE** |
| **T0** | 32+  3,2 | 31,56+  3,2 | 30,32±  2,7 | 29,01±  5,3 | 28,76+  4,3 | 27,18+  3,1 | 27,48+  2,9 | 27,93+  3,7 | 29,64+  3,27 | 28,92+  3,82 |
| **T1** | 24,94+  1,8 | 25+  1,8 | 23,34±  3,4 | 24,75±  4,9 | 24,01+  3,9 | 25,23+  3,9 | 25,12+  3,1 | 24,25+  3,3 | 24,35+  3,1 | 24,80+  3,47 |
| **T2** | 28+  2,0 | 28+  2,0 | 25,32+  3,5 | 24,78+  3,2 | 25,67+  2,8 | 25,86+  2,9 | 25,11+  3,4 | 24,98+  2,9 | 26,02+  2,92 | 25,90+  2,75 |
| **T3** | 27+  3,4 | 27+  3,4 | 25,67+  2,3 | 25,5±  4,6 | 25,92+  3,2 | 26,13+  2,7 | 25,09+  4,1 | 24,91+  3,1 | 25,92+  3,25 | 25,88+  3,45 |
| ***P* valor** | | | | | | | | | **0,0161*** | **0,0224*** |
| ***F* valor** | | | | | | | | | 4,0747 | 2,1816 |

**Tabela S3.** Médias e desvio-padrão das medidas dos audiogramas em diferentes frequências de fala e intervalos de tempo em decibéis no grupo Ib (teste ANOVA)

**Tabela S4**. Resultados do teste *post-hoc* de Tukey HSD explicando as significâncias nas análises de variância para o grupo Ib

| **Comparação Intragrupo** | **Média da Diferença** | | | **IC95%** | | ***P* valor** | |
| --- | --- | --- | --- | --- | --- | --- | --- |
| **OD** | | **OE** | **OD** | **OE** | **OD** | **OE** |
| **T0 vs. T1** | -5,2900 | -4,1200 | | -9,5741 a -1,0059 | -8,7544 a 0,5144 | **0,0111*** | **0,0449*** |
| **T0 vs. T2** | -3,6200 | -3,0200 | | -7,9041 a 0,6641 | -7,6544 a 1,6144 | 0,1206 | 0,3041 |
| **T0 vs. T3** | -3, 7200 | -3,0400 | | -8,0041 a 0,5641 | -7,6744 a 1,5944 | 0,1063 | 0,2987 |
| **T1 vs. T2** | 1,6700 | 1,1000 | | -2,5296 a 2,6496 | -3,5344 a 5,7344 | 0,7136 | 0,9153 |
| **T1 vs. T3** | 1,5700 | 1,0800 | | -2,5996 a 2,5796 | -3,5544 a 5,7144 | 0,7503 | 0,9194 |
| **T2 vs. T3** | -0,1000 | -0,0200 | | -2,6596 a 2,5196 | -4,6544 a 4,6144 | 0,9999 | 1,2872 |

OD, orelha direita; OE, orelha esquerda

**Tabela S5**. Médias e desvio-padrão das medidas dos audiogramas em diferentes frequências de fala e intervalos de tempo em decibéis no grupo Ic (teste ANOVA)

| **Classificação** | **Grupo Sem Fissura -Moderada** | | | | | | | | | |
| --- | --- | --- | --- | --- | --- | --- | --- | --- | --- | --- |
| **Frequência (Hz)** | **250** | | **500** | | **1000** | | **2000** | |  |  |
|  | **OD** | **OE** | **OD** | **OE** | **OD** | **OE** | **OD** | **OE** | **Média da OD** | **Média da OE** |
| **T0** | 59+  3,2 | 59+  3,2 | 52,15+  4,3 | 51,74+  4,7 | 45,16+  5,1 | 46,25+  5,6 | 43,17+  3,6 | 43,18+  4,1 | 49,87  4,05 | 54,40  4,4 |
| **T1** | 54+  1,9 | 54+  1,9 | 44,78+  3,9 | 45,67+  5,1 | 39,18+  4,3 | 39,54+ 5,5 | 37,08+  3,9 | 38,14+  4,7 | 43,76  3,5 | 44,33  4,3 |
| **T2** | 55+  2,4 | 55+  2,4 | 45,13+  3,2 | 45,21+  4,3 | 40,11+  4,6 | 38,96+  4,1 | 37,17+  4,1 | 38,11+  3,8 | 44,35  3,57 | 44,32  3,65 |
| **T3** | 54+  ,7 | 54+  1,7 | 46,11+  4,1 | 45,01+  4,6 | 40,16+  5,1 | 37,17+  4,9 | 38,18+  4,7 | 38,05+  4,3 | 44,61  3,65 | 43,55  3,87 |
| ***P* valor** | | | | | | | | | 0,0647 | **0,0023*** |
| ***F* valor** | | | | | | | | | 2,9425 | 7,5621 |

**Tabela S6.** Resultados do teste *post-hoc* de Tukey HSD explicando as significâncias nas análises de variância para o grupo Ic

| **Comparação Intragrupo** | **Diferença Média** | | | **IC95%** | | ***P-*valor** | |
| --- | --- | --- | --- | --- | --- | --- | --- |
| **OD** | | **OE** | **OD** | **OE** | **OD** | **OE** |
| **T0 vs. T1** | -6,1100 | -10,0700 | | -12,8026 a 0,5826 | -17,4284 a -2,7116 | 0,0799 | **0,0061*** |
| **T0 vs. T2** | -5,5200 | -10,0800 | | -12,2126 a 1,1726 | -17,4384 a -2,7216 | 0,1258 | **0,0060*** |
| **T0 vs. T3** | -5,2600 | -9,8500 | | -11,9526 a 1,4326 | -17,2084 a -2,4916 | 0,1524 | **0,0072*** |
| **T1 vs. T2** | 0,5900 | -0,0100 | | -6,1026 a 7,2826 | -7,3684 a 7,3484 | 0,9941 | 2,3771 |
| **T1 vs. T3** | 0,8500 | 0,2200 | | -5,8426 a 7,5426 | -7,1384 a 7,5784 | 0,9830 | 0,9998 |
| **T2 vs. T3** | 0,2600 | 0,2300 | | -6,4326 a 6,9526 | -7,1284 a 7,5884 | 0,9995 | 0,9997 |

**Tabela S7.** Médias e desvio-padrão das medidas dos audiogramas em diferentes frequências de fala e intervalos de tempo em decibéis no grupo Id (teste ANOVA)

| **Classificação** | **Grupo Sem Fissura - Grave** | | | | | | | | | |
| --- | --- | --- | --- | --- | --- | --- | --- | --- | --- | --- |
| **Frequência (Hz)** | **250** | | **500** | | **1000** | | **2000** | |  |  |
|  | **OD** | **OE** | **OD** | **OE** | **OD** | **OE** | **OD** | **OE** | **Média da OD** | **Média da OE** |
| **T0** | 75+  2,2 | 75+  2,2 | 72,97+  3,4 | 71,56+  3,9 | 71,78+  4,7 | 72,28+  5,1 | 71,09+  5,3 | 72,55+  4,9 | 72,71+  3,9 | 72,84+  4,02 |
| **T1** | 73+  3,8 | 73+  3,8 | 69,15+  4,1 | 70,07+  4,1 | 71,11+  4,5 | 69,94+  4,7 | 68,75+  5,3 | 70,64+  5,4 | 70,50+  4,42 | 70,91+  4,5 |
| **T2** | 73+  2,9 | 73+  2,9 | 69,26+  4,3 | 70,12+  3,8 | 70,86+  5,1 | 70,51+  5,6 | 68,37+  5,9 | 70,61+  5,1 | 70,37+  4,55 | 71,06+  4,35 |
| **T3** | 74+  2,3 | 74+  2,3 | 69,12+  3,6 | 70,67+  4,1 | 69,97+  5,3 | 70,04+  5,4 | 68,61+  5 | 70,18+  5,7 | 70,83+  4,05 | 71,22+  4,37 |
| ***P* valor** | | | | | | | | | 0,9360 | 0,9638 |
| ***F* valor** | | | | | | | | | 0,1320 | 0,0865 |

**Tabela S8**. Médias e desvio-padrão das medidas dos audiogramas em diferentes frequências de fala e intervalos de tempo em decibéis do grupo IIa (teste ANOVA)

| **Classificação** | **Grupo Fissura-Normal a muito leve** | | | | | | | | | |
| --- | --- | --- | --- | --- | --- | --- | --- | --- | --- | --- |
| **Frequência (Hz)** | **250** | | **500** | | **1000** | | **2000** | |  |  |
|  | **OD** | **OE** | **OD** | **OE** | **OD** | **OE** | **OD** | **OE** | **Média da OD** | **Média da OE** |
| **T0** | 24+  4,1 | 25+  3,2 | 22,12+  2,3 | 21,98+  3,1 | 19,67+  2,9 | 19,78+  2,9 | 18,88+  3,1 | 17,68+  2,9 | 21,16+  3,1 | 21,11+  3,02 |
| **T1** | 19+  0,98 | 23+  1,3 | 18,32+  3,1 | 18,38+  3,7 | 15,26+  3,2 | 16,12+  2,1 | 15,47+  3,3 | 14,14+  3,4 | 17,01+  2,64 | 17,91+  2,62 |
| **T2** | 20+  1,2 | 21+  2,8 | 16,23+  3,3 | 16,1+  2,9 | 14,87+  3,4 | 16,08+  3,1 | 14,58+  2,9 | 14,28+  3,1 | 15,94+  2,7 | 16,86+  2,97 |
| **T3** | 20+  1,2 | 22+  3,6 | 16,43+  2,7 | 15,98+  3,0 | 13,29+  3,1 | 15,97+  2,6 | 14,05+  3,4 | 13,47+  3,9 | 15,94+  2,6 | 16,85+  3,27 |
| ***P* valor** | | | | | | | | | **0,0003*** | **0,0082*** |
| ***­­ F* valor** | | | | | | | | | 8,1097 | 4,5707 |

**Tabela S9**. Resultados do teste *post-hoc* de Tukey HSD explicando as significâncias nas análises de variância para o grupo IIa

| **Comparação Intragrupo** | **Média da diferença** | | **IC95%** | | ***P* valor** | |
| --- | --- | --- | --- | --- | --- | --- |
| **OD** | **OE** | **OD** | **OE** | **OD** | **OE** |
| **T0 vs. T1** | -4,1500 | -3,2000 | -7,4715 a -0,8285 | -6,7881 a 0,3881 | **0,0095*** | **0,0448*** |
| **T0 vs. T2** | -5,2200 | -4,2500 | -8,5415 a -1,8985, | -7,8381 a -0,6619 | **0,0008*** | **0,0149*** |
| **T0 vs. T3** | -5,2200 | -4,2600 | -8,5415 a -1,8985, | -7,8481 a -0,6719 | **0,0008*** | **0,0146*** |
| **T1 vs. T2** | -1,0700 | -1,0500 | -4,3915 a 2,2515 | -4,6381 a 2,5381 | 0,8214 | 0,8593 |
| **T1 vs. T3** | -1,0700 | -0,1600 | -4,3915 a 2,2515 | -4,6481 a 2,5281 | 0,8214 | 0,8559 |
| **T2 vs. T3** | 0,0000 | -0,0100 | -3,3215 a 3,3215 | -3,5981 a 3,5781 | **0,0000*** | 1,0133 |

**Tabela S10**. Médias e desvio-padrão das medidas dos audiogramas em diferentes frequências de fala e intervalos de tempo em decibéis do grupo IIb (teste ANOVA)

| **Classificação** | **Grupo Fissura -Leve** | | | | | | | | | |
| --- | --- | --- | --- | --- | --- | --- | --- | --- | --- | --- |
| **Frequência (Hz)** | **250** | | **500** | | **1000** | | **2000** | |  |  |
|  | **OD** | **OE** | **OD** | **OE** | **OD** | **OE** | **OD** | **OE** | **Média da OD** | **Média da OE** |
| **T0** | 32+  4,3 | 34+  5,1 | 30,42+  4,2 | 31,87+  3,2 | 28,78+  3,1 | 27,91+  2,9 | 27,05+  3,1 | 27,51+  3,9 | 29,56+  3,67 | 30,32+  3,77 |
| **T1** | 28+  3,9 | 29+  2,7 | 27,18+  4,8 | 27,96+  4,2 | 26,12+  3,6 | 24,95+  4,1 | 24,17+  3,9 | 23,65+  4,1 | 26,36+  4,05 | 26,39+  3,77 |
| **T2** | 26+  4,4 | 28+  4,1 | 26,07+  3,7 | 26,13+  3,7 | 26,05+  3,7 | 23,87+  4,3 | 23,87+  4,2 | 22,65+  3,4 | 25,49+  4,15 | 25,16+  3,85 |
| **T3** | 27+  5,3 | 27+  3,9 | 25,94+  4,1 | 26,2+  4,3 | 27,01+  4,1 | 23,78+  3,8 | 23,1+  4,7 | 22,71+  4,9 | 25,76+  4,55 | 24,92+  4,22 |
| ***P* valor** | | | | | | | | | 0,1962 | **0,0357*** |
| ***F* valor** | | | | | | | | | 1,6691 | 3,2740 |

**Tabela S11**. Resultados do teste *post-hoc* de Tukey HSD explicando as significâncias nas análises de variância para o grupo IIb

| **Comparação Intragrupo** | **Média da diferença** | | | **IC95%** | | ***P* valor** | |
| --- | --- | --- | --- | --- | --- | --- | --- |
| **OD** | | **OE** | **OD** | **OE** | **OD** | **OE** |
| **T0 vs. T1** | -3,2000 | -3,9300 | | -8,8203 a 2,4203 | -9,2636 a 1,4036 | 0,4200 | 0,2078 |
| **T0 vs. T2** | -4,0700 | -5,1600 | | -9,6903 a 1,5503 | -10,4936 a 0,1736 | 0,2205 | 0,0607 |
| **T0 vs. T3** | -3,8000 | -5,4000 | | -9,4203 a 1,8203 | -10,7336 a -0,0664 | 0,2739 | **0,0464*** |
| **T1 vs. T2** | -0,8700 | - 1,2300 | | -6,4903 a 4,7503, | -6,5636 a 4,1036 | 0,9741 | 0,9216 |
| **T1 vs. T3** | -0,6000 | - 1,4700 | | -6,2203 a 5,0203 | - 6,8036 a 3,8636 | 0,9912 | 0,8748 |
| **T2 vs. T3** | 0,2700 | - 0,2400 | | -5,3503 a 5,8903 | - 5,5736 a 5,0936 | 0,9992 | 0,9993 |

**Tabela S12**. Médias e desvio-padrão das medidas dos audiogramas em diferentes frequências de fala e intervalos de tempo em decibéis no grupo IIc (teste ANOVA)

| **Classificação** | **Grupo Fissura -Moderada** | | | | | | | | | |
| --- | --- | --- | --- | --- | --- | --- | --- | --- | --- | --- |
| **Frequência (Hz)** | **250** | | **500** | | **1000** | | **2000** | |  |  |
|  | **OD** | **OE** | **OD** | **OE** | **OD** | **OE** | **OD** | **OE** | **Média da OD** | **Média da OE** |
| **T0** | 61+  4,4 | 61+4  ,4 | 59,65+  7,6 | 59,54+  6,1 | 58,76+  7,1 | 58,66+  7,2 | 56,74+  5,9 | 57,17+  6,3 | 59,03+  6,25 | 59,09+  5,9 |
| **T1** | 60+  4,8 | 59+  5,6 | 58,15+  6,7 | 58,49+  6,9 | 57,96+  6,5 | 57,69+  6,8 | 54,17+  6,4 | 56,97+  6,6 | 57,57+  6,1 | 58,03+  6,47 |
| **T2** | 58+  3,6 | 57,9+  3,5 | 58,07+  7,3 | 58,66+  6,5 | 58,12+  7,3 | 57,12+  6,4 | 53,98+  6,9 | 55,87+  6,6 | 57,04+  6,27 | 57,38+  5,75 |
| **T3** | 59+  3,8 | 59,1+  4,8 | 58,66+  4,8 | 57,9+  5,4 | 57,1+  6,1 | 56,96+  7,1 | 52,79+  6,1 | 56,1+  7,1 | 56,88+  5,2 | 57,51+  5,62 |
| ***P* valor** | | | | | | | | | 0,9212 | 0,9575 |
| ***F* valor** | | | | | | | | | 0,1612 | 0,1027 |

**Tabela S13.** Médias e desvio-padrão das medidas dos audiogramas em diferentes frequências de fala e intervalos de tempo em decibéis no grupo IId (teste ANOVA)

| **Classificação** | **Grupo Fissura -Grave** | | | | | | | | | |
| --- | --- | --- | --- | --- | --- | --- | --- | --- | --- | --- |
| **Frequência (Hz)** | **250** | | **500** | | **1000** | | **2000** | |  |  |
|  | **OD** | **OE** | **OD** | **OE** | **OD** | **OE** | **OD** | **OE** | **Média da OD** | **Média da OE** |
| **T0** | 81+  4,2 | 83+  5,2 | 78,67+  5,7 | 78,76+  6,7 | 75,78+  5,8 | 76,87+  6,7 | 73,17+  6,4 | 73,76+  6,8 | 77,15+  5,52 | 78,09+  6,35 |
| **T1** | 79+  5,8 | 81+  4,8 | 76,39+  6,1 | 77,17+  6,1 | 73,32+  6,2 | 74,96+  6,5 | 72,91+  6,1 | 71,12+  6,6 | 76,01+  6,12 | 76,06+  6 |
| **T2** | 78+  5,2 | 80+  6,5 | 77,1+  7,4 | 77,0+  6,8 | 72,49+  5,9 | 74,1+  5,8 | 72,02+  6,9 | 70,07+  6,1 | 74,90+  6,35 | 75,29+  6,3 |
| **T3** | 79+  6,3 | 79+  6,9 | 77,01+  5,9 | 78,38+  6,1 | 71,96+  7,1 | 73,17+  6,8 | 72,62+  6,1 | 70,43+  5,9 | 75,14+  6,1 | 75,24+  6,42 |
| ***P* valor** | | | | | | | | | 0,9660 | 0,9359 |
| ***F* valor** | | | | | | | | | 0,0856 | 0,1358 |

**Tabela S14.** Médias e desvio-padrão do volume da orelha média e valores de complacência estática (cest) para grupos individuais (teste ANOVA)

| **Períodos** | **Volume da orelha média** | | **Valor de complacência estática** | | **Volume da orelha média** | | **Valor de complacência estática** | |
| --- | --- | --- | --- | --- | --- | --- | --- | --- |
|  | **OD** | **OE** | **OD** | **OE** | **OD** | **OE** | **OD** | **OE** |
|  | **Grupo Sem Fissura -Normal a muito leve (grupo Ia)** | | | | **Grupo com Fissura -** **Normal a muito leve (grupo IIa)** | | | |
| **T0** | 0,9±0,2 | 1,1±0,2 | 0,75±0,22 | 0,68±0,15 | 1,12±0,21 | 1,14±0,13 | 0,67±0,17 | 0,69±0,16 |
| **T1** | 1,3±0,4 | 1,4±0,6 | 0,74±0,43 | 0,67±0,17 | 1,28±0,12 | 1,27±0,15 | 0,74±0,12 | 0,76±0,21 |
| **T2** | 1,1±0,2 | 1,2±0,2 | 0,79±0,34 | 0,72±0,11 | 1,31±0,18 | 1,28±0,11 | 0,75±0,14 | 0,74±0,11 |
| **T3** | 1,2±0,1 | 1,3±0,4 | 0,78±0,15 | 0,79±0,14 | 1,29±0,14 | 1,27±0,20 | 0,74±0,11 | 0,75±0,19 |
| ***P*-valor** | **0,0043*** | 0,3142 | 0,9770 | 0,2114 | **0,05*** | 0,1386 | 0,5415 | 0,8051 |
|  | **Grupo Sem Fissura -Leve (grupo Ib)** | | | | **Grupo com Fissura – Leve (grupo IIb)** | | | |
| **T0** | 0,8±0,2 | 1,11±0,11 | 0,75±0,17 | 0,69±0,18 | 1,01±0,10 | 1,12±0,15 | 0,67±0,19 | 0,66±0,10 |
| **T1** | 1,31±0,4 | 1,4± 0,15 | 0,77±0,12 | 0,74±0,13 | 1,24±0,16 | 1,34±0,12 | 0,69±0,13 | 0,71±0,11 |
| **T2** | 1,1±0,2 | 1,0± 0,2 | 0,74±0,16 | 0,76±0,11 | 1,31±0,17 | 1,35±0,17 | 0,71±0,17 | 0,72±0,13 |
| **T3** | 1,2±0,1 | 1,3± 0,4 | 0,76±0,14 | 0,77±0,15 | 1,33±0,12 | 1,37±0,11 | 0,73±0,12 | 0,77±0,14 |
| ***P-*valor** | **0,0024*** | **0,0111*** | 0,9802 | 0,763 | **0,0003*** | **0,0037*** | 0,8806 | 0,3615 |
|  | **Grupo Sem Fissura -Moderada (grupo Ic)** | | | | **Grupo com Fissura -Moderada (grupo IIc)** | | | |
| **T0** | 0,6±0,2 | 0,87±0,2 | 0,42±0,10 | 0,38±0,19 | 0,84±0,15 | 0,79±0,17 | 0,54±0,10 | 0,58±0,15 |
| **T1** | 1,34±0,5 | 1,4±0,6 | 0,45±0,14 | 0,39±0,10 | 0,85±0,11 | 0,83±0,16 | 0,55±0,18 | 0,61±0,11 |
| **T2** | 1,37±0,2 | 1,0±0,2 | 0,44±0,12 | 0,41±0,10 | 0,88±0,18 | 0,81±0,11 | 0,53±0,14 | 0,6±0,21 |
| **T3** | 1,27±0,1 | 1,3±0,4 | 0,43±0,12 | 0,4±0,12 | 0,89±0,16 | 0,82±0,19 | 0,54±0,10 | 0,62±0,19 |
| ***P*-valor** | **0,0019*** | 0,1455 | 0,9814 | 0,9859 | 0,9304 | 0,9762 | 0,9954 | 0,9797 |
|  | **Grupo Sem Fissura -Grave (grupo Id)** | | | | **Grupo com Fissura -Grave (grupo IId)** | | | |
| **T0** | 0,62±0,1 | 1,1±0,2 | 0,51±0,21 | 0,48±0,25 | 0,59±0,22 | 0,62±0,32 | 0,46±0,19 | 0,51±0,20 |
| **T1** | 1,3±0,4 | 1,4±0,6 | 0,54±0,11 | 0,52±0,19 | 0,57±0,10 | 0,65±0,21 | 0,51±0,21 | 0,45±0,12 |
| **T2** | 1,1±0,2 | 1,0±0,2 | 0,55±0,09 | 0,5±0,15 | 0,51±0,19 | 0,64±0,20 | 0,5±0,27 | 0,49±0,12 |
| **T3** | 1,2±0,1 | 1,3±0,4 | 0,53±0,18 | 0,51±0,14 | 0,5±0,17 | 0,62±0,23 | 0,53±0,19 | 0,56±0,18 |
| ***P*-valor** | 0,1394 | 0,7344 | 0,9955 | 0,9966 | 0,9000 | 0,9984 | 0,9818 | 0,8606 |

**Tabela S15**. Comparação múltipla de valores de *P* utilizando o teste *post-hoc* de Tukey HSD para volumes da orelha média para o grupo Ia

| **Comparação Intragrupo** | **Média de diferença** | | | **IC95%** | | ***P* valor** | |
| --- | --- | --- | --- | --- | --- | --- | --- |
| **OD** | | **OE** | **OD** | **OE** | **OD** | **OE** |
| **T0 vs. T1** | 0,4000 | 0,3000 | | -0,1143 a 0,6857 | -0,1427 a 0,7427 | **0,0030*** | 0,2807 |
| **T0 vs. T2** | 0,2000 | 0,1000 | | -0,0857 a 0,4857 | -0,3427 a 0,5427 | 0,2544 | 0,9297 |
| **T0 vs. T3** | 0,3000 | 0,2000 | | 0,0143 a 0,5857 | -0,2427 a 0,6427 | **0,0364*** | 0,6236 |
| **T1 vs. T2** | -0,2000 | 0,2000 | | -0,4857 a 0,0857 | -0,6427 a 0,2427 | **0,0354*** | 0,6236 |
| **T1 vs. T3** | -0,1000 | 0,1000 | | -0,3857 a 0,1857 | -0,5427 a 0,3427 | 0,9982 | 0,9297 |
| **T2 vs. T3** | 0,1000 | 0,1000 | | -0,1857 a 0,3857 | -0,3427 a 0,5427 | 0,7846 | 0,9297 |

**Tabela S16.** Resultados do teste *post-hoc* de Tukey HSD do volume da orelha média para o grupo IIa

| **Comparação Intragrupo** | **Média de diferença** | | | **IC95%** | | ***P* valor** | |
| --- | --- | --- | --- | --- | --- | --- | --- |
| **OD** | | **OE** | **OD** | **OE** | **OD** | **OE** |
| **T0 vs. T1** | 0,1600 | 0,1300 | | - 0,0402 a 0,3602 | -0,0522 a 0,3122 | 0,1562 | 0,2370 |
| **T0 vs. T2** | 0,1900 | 0,1400 | | - 0,0102 a 0,3902 | - 0,0422 a 0,3222 | 0,0680 | 0,1824 |
| **T0 vs. T3** | 0,1700 | 0,1300 | | - 0,0302 a 0,3702 | - 0,0522 a 0,3122 | 0,1200 | 0,2370 |
| **T1 vs. T2** | 0,0300 | 0,0100 | | - 0,1702 a 0,2302 | - 0,1722 a 0,1922 | 0,9774 | 0,9988 |
| **T1 vs. T3** | 0,0100 | 0,0000 | | - 0,1902 a 0,2102 | - 0,1822 a 0,1822, | **0,0000*** | 0,9991 |
| **T2 vs. T3** | -0,0200 | -0,0100 | | - 0,2202 a 0,1802 | - 0,1922 a 0,1722 | 0,9931 | 0,9988 |

**Tabela S17**. Resultados do teste *post-hoc* de Tukey HSD para volume da orelha média no grupo Ib

| **Comparação Intragrupo** | **Média da diferença** | | | **IC95%** | | ***P* valor** | |
| --- | --- | --- | --- | --- | --- | --- | --- |
| **OD** | | **OE** | **OD** | **OE** | **OD** | **OE** |
| **T0 vs. T1** | 0,5100 | 0,2900 | | 0,1687 a 0,8513 | -0,0406 a 0,6206 | **0,0018*** | 0,1013 |
| **T0 vs. T2** | 0,3000 | 0,1100 | | -0,0413 a 0,6413 | -0,4406 a 0,2206 | 0,1003 | 0,8005 |
| **T0 vs. T3** | 0,4000 | 0,1900 | | 0,0587 a 0,7413 | -0,1406 a 0,5206 | **0,0169*** | 0,4119 |
| **T1 vs. T2** | 0,2100 | 0,4000 | | -0,5513 a 0,2313 | -0,7306 a -0,0694 | 0,3527 | **0,0132*** |
| **T1 vs. T3** | 0,1100 | 0,1000 | | -0,4513 a 0,2313 | -0,4306 a 0,2306 | 0,8151 | 0,8418 |
| **T2 vs. T3** | 0,1000 | 0,3000 | | -0,2413 a 0,4413 | -0,0306 a 0,6306 | 0,8538 | 0,0857 |

**Tabela S18**. Resultados do teste *post-hoc* de Tukey HSD para volume da orelha média no grupo IIb

| **Comparação Intragrupo** | **Média da diferença** | | | **IC95%** | | ***P* valor** | |
| --- | --- | --- | --- | --- | --- | --- | --- |
| **OD** | | **OE** | **OD** | **OE** | **OD** | **OE** |
| **T0 vs. T1** | 0,2300 | 0,2200 | | 0,0383 a 0,4217 | 0,0295 a 0,4105 | **0,0141*** | **0,0189*** |
| **T0 vs. T2** | 0,3000 | 0,2300 | | 0,1083 a 0,4917 | 0,0395 a 0,425 | **0,0011*** | **0,0134*** |
| **T0 vs. T3** | 0,3200 | 0,2500 | | 0,1283 a 0,5117 | 0,0595 a 0,4405 | **0,0005*** | **0,0066*** |
| **T1 vs. T2** | 0,0700 | 0,0100 | | 0,1217 a 0,2617 | -0,1805 a 0,2005 | 0,7524 | 0,9989 |
| **T1 vs. T3** | 0,0900 | 0,0300 | | 0,1017 a 0,2817 | -0,1605 a 0,2205 | 0,5818 | 0,9728 |
| **T2 vs. T3** | 0,0200 | 0,0200 | | 0,717 a 0,2117 | -0,1705 a 0,2105 | 0,9918 | 0,9916 |

**Tabela S19**. Resultados do teste *post-hoc* de Tukey HSD para o volume da orelha média do grupo Ic

| **Comparação Intragrupo** | **Média da diferença** | | | **IC95%** | | ***P* valor** | |
| --- | --- | --- | --- | --- | --- | --- | --- |
| **OD** | | **OE** | **OD** | **OE** | **OD** | **OE** |
| **T0 vs. T1** | 0,7400 | 0,5300 | | 0,2125 a 1,2675 | -0,1708 a 1,2308 | **0,0050*** | 0,1757 |
| **T0 vs. T2** | 0,7700 | 0,1300 | | 0,2425 a 1,2975 | -0,5708 a 0,8308 | **0,0036*** | 0,9503 |
| **T0 vs. T3** | 0,6700 | 0,4300 | | 0,1425 a 1,1975 | -0,2708 a 1,1308 | **0,0108*** | 0,3294 |
| **T1 vs. T2** | 0,0300 | -0,4000 | | 0,4975 a 0,5575 | -1,1008 a 0,3008 | 0,9984 | 0,3891 |
| **T1 vs. T3** | 0,0700 | -0,1000 | | 0,5975 a 0,4575 | -0,8008 a 0,6008 | 0,9807 | 0,9762 |
| **T2 vs. T3** | 0,1000 | 0,3000 | | 0,6275 a 0,4275 | -0,4008 a 1,0008 | 0,9473 | 0,6208 |
